# Supplementary material for: Development of New Resolvin D1 Analogues for Osteoarthritis Therapy: Acellular and Computational Approaches to Study Their Antioxidant Activities
Source: MDPI journal article supplement (doi:10.3390/antiox13040386), 2024-03-22
Supplement: s1 [file s1]

## Supplementary information

### Development of New Resolvin D1 Analogues: Acellular and Computational Approaches to Study Their Antioxidant Activities

Zahra Kariminezhad<sup>1</sup>, Mahdi Rahimi<sup>1</sup>, Julio Fernandes<sup>1</sup>, René Maltais<sup>2</sup>, Jean-Yves Sanceau<sup>2</sup>, Donald Poirier<sup>2,3</sup>, Hassan Fahmi<sup>4</sup>, Mohamed Benderdour<sup>1\*</sup>

<sup>1</sup> Orthopedic Research Laboratory, Hôpital du Sacré-Cœur de Montréal, Université de Montréal, Montréal, QC, Canada.

<sup>2</sup> Department of Molecular Medicine, Faculty of Medicine, Université Laval, Québec, QC, Canada.

<sup>3</sup> Organic Synthesis Service, Medicinal Chemistry Platform, CHU de Québec Research Center- Université Laval, Québec, QC, Canada.

<sup>4</sup> Osteoarthritis Research Unit, University of Montreal Hospital Research Center (CRCHUM), Montreal, QC, Canada

\* Correspondance email: mohamed.benderdour@umontreal.ca; Tel.: (514 338- 2222 #3279)

### RvD1 analogue 1:

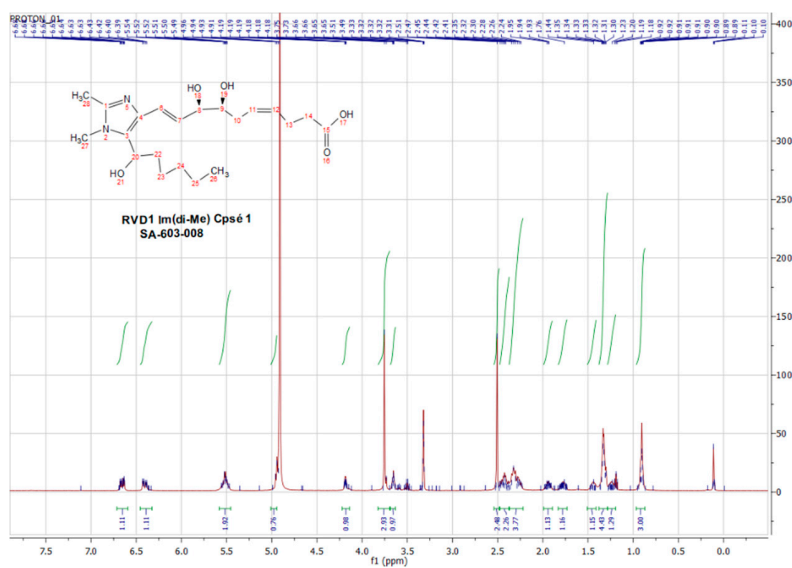

**Figure S1:**  $^1\text{H}$  NMR spectrum analogue 1

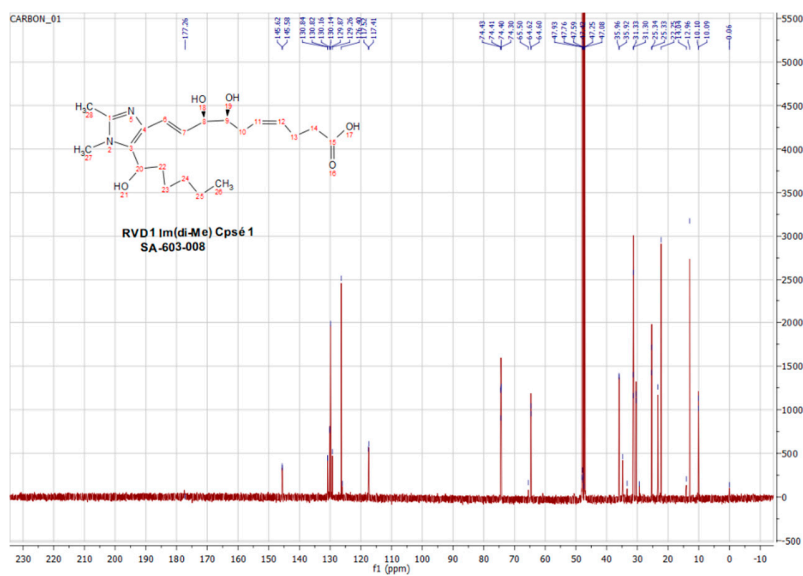

**Figure S2:**  $^{13}\text{C}$  NMR spectrum analogue 1

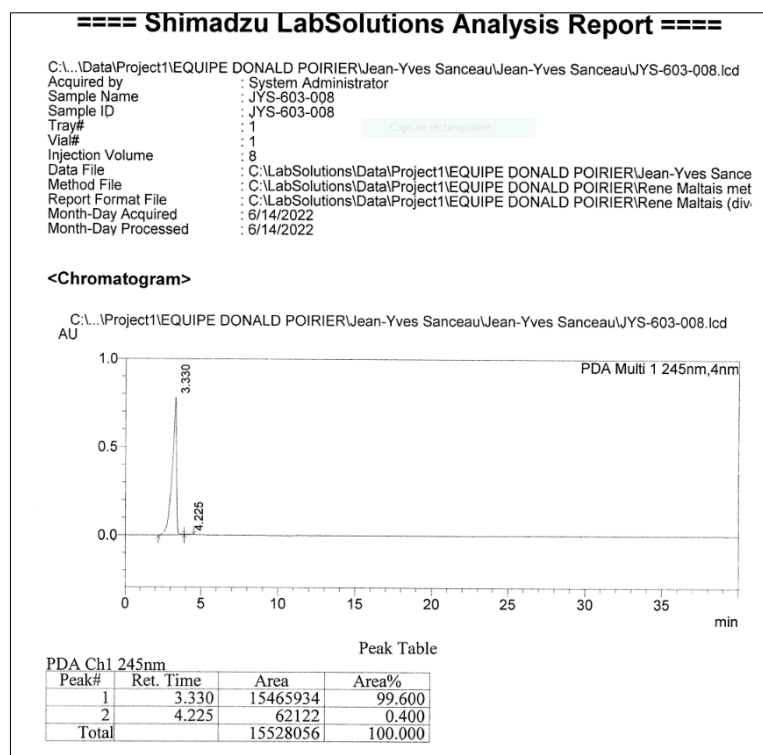

**Figure S3:** LCMS chromatogram analogue 1

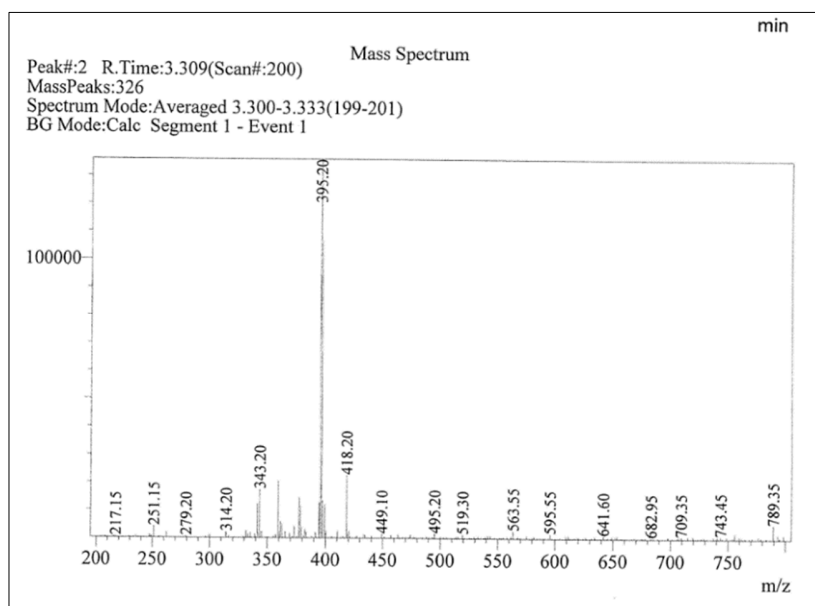

**Figure S4:** Mass spectrum analogue 1

RvD1 analogue 2:

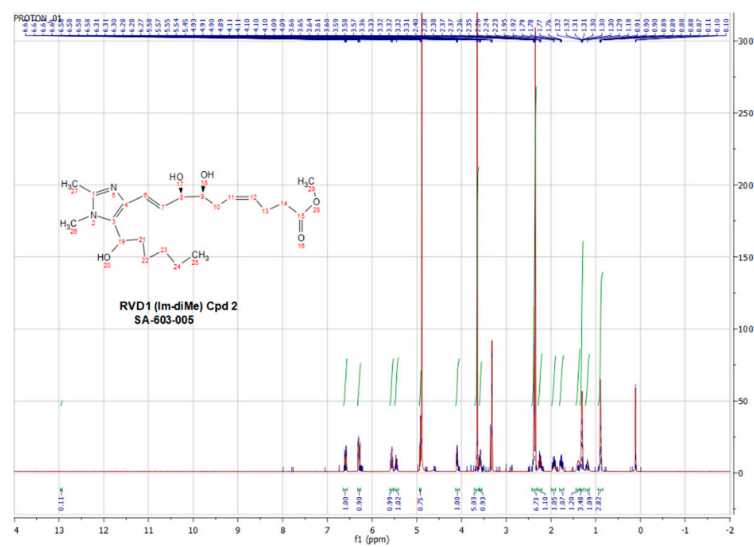

Figure S5:  $^1\text{H}$  NMR spectrum analogue 2

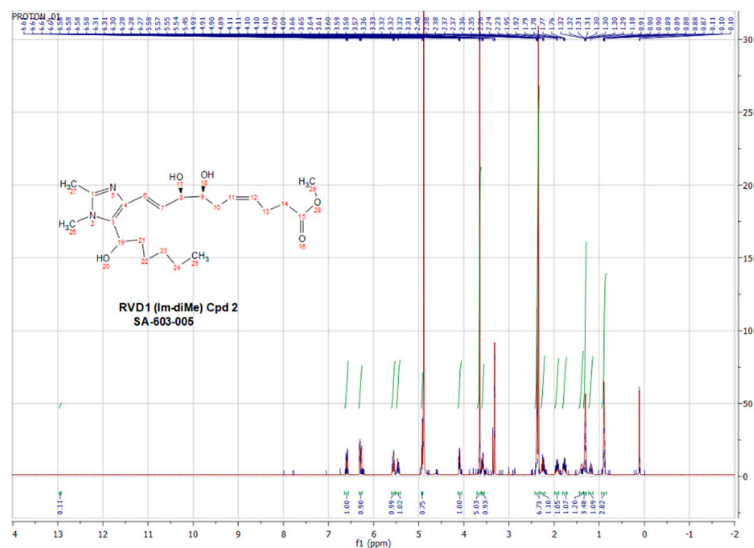

Figure S6:  $^{13}\text{C}$  NMR spectrum analogue 2

# ==== Shimadzu LabSolutions Analysis Report ====

C:\...Data\Project1\EQUIPE DONALD POIRIER\Jean-Yves Sanceau\Jean-Yves Sanceau\JYS-603-005.lcd  
 Acquired by : System Administrator  
 Sample Name : JYS-603-005  
 Sample ID : JYS-603-005  
 Tray# : 1  
 Vial# : 1  
 Injection Volume : 7  
 Data File : C:\LabSolutions\Data\Project1\EQUIPE DONALD POIRIER\Jean-Yves Sanceau\Jean-Yves Sanceau\JYS-603-005.lcd  
 Method File : C:\LabSolutions\Data\Project1\EQUIPE DONALD POIRIER\Rene Maltais met  
 Report Format File : C:\LabSolutions\Data\Project1\EQUIPE DONALD POIRIER\Rene Maltais met  
 Month-Day Acquired : 6/13/2022  
 Month-Day Processed : 6/13/2022

## <Chromatogram>

C:\...Data\Project1\EQUIPE DONALD POIRIER\Jean-Yves Sanceau\Jean-Yves Sanceau\JYS-603-005.lcd  
 AU

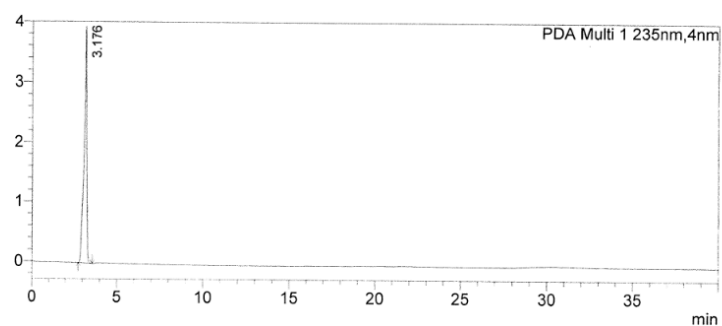

Peak Table

| Peak# | Ret. Time | Area     | Area%   |
|-------|-----------|----------|---------|
| 1     | 3.176     | 41400132 | 100.000 |
| Total |           | 41400132 | 100.000 |

Figure S7: LCMS chromatogram analogue 2

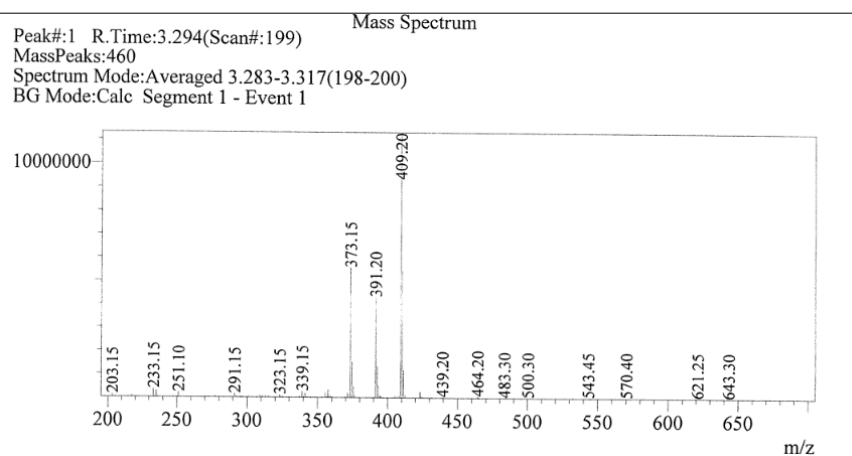

Figure S8: Mass spectrum analogue 2

### Mulliken Charge Distribution:

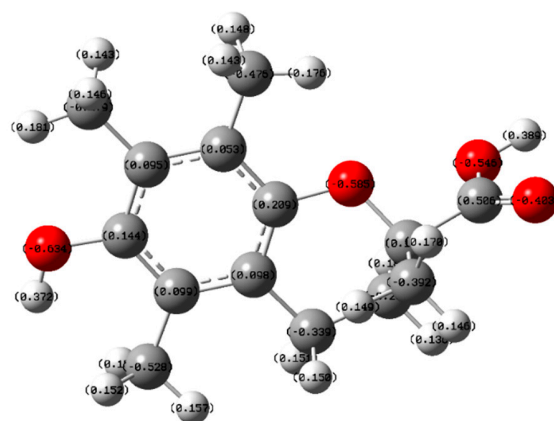

Figure S9: Mulliken charge distribution for Trolox

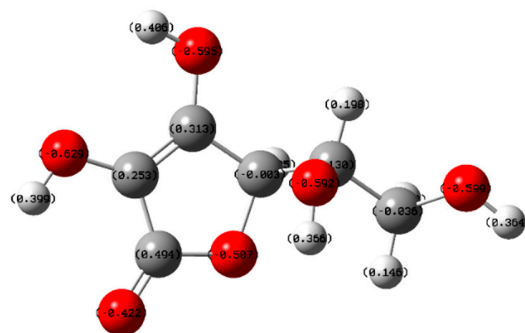

Figure S10: Mulliken charge distribution for Ascorbic Acid

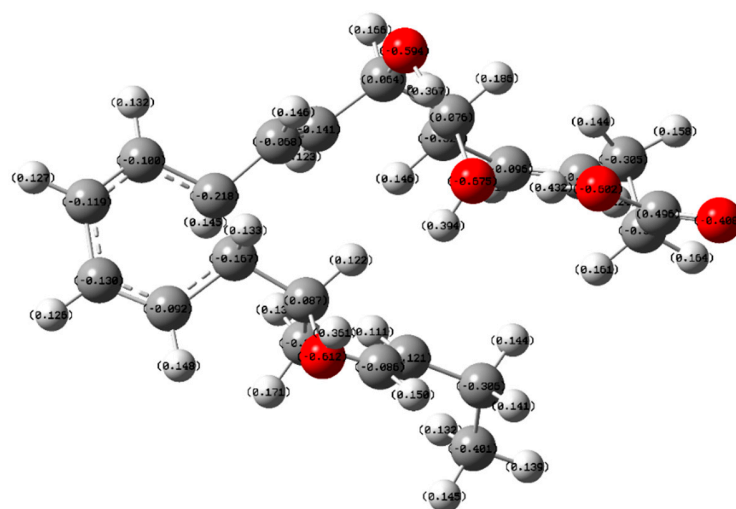

Figure S11: Mulliken charge distribution for ResolvinD1

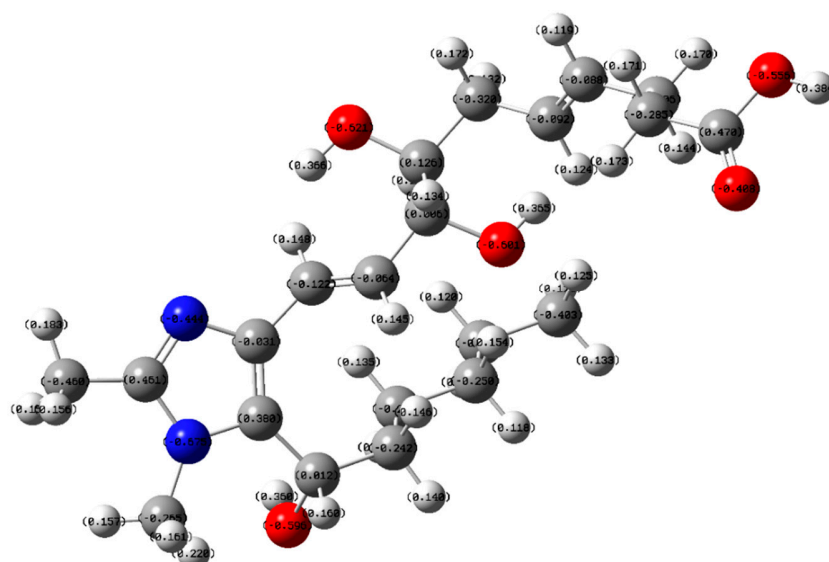

Figure S12: Mulliken charge distribution for analogue 1

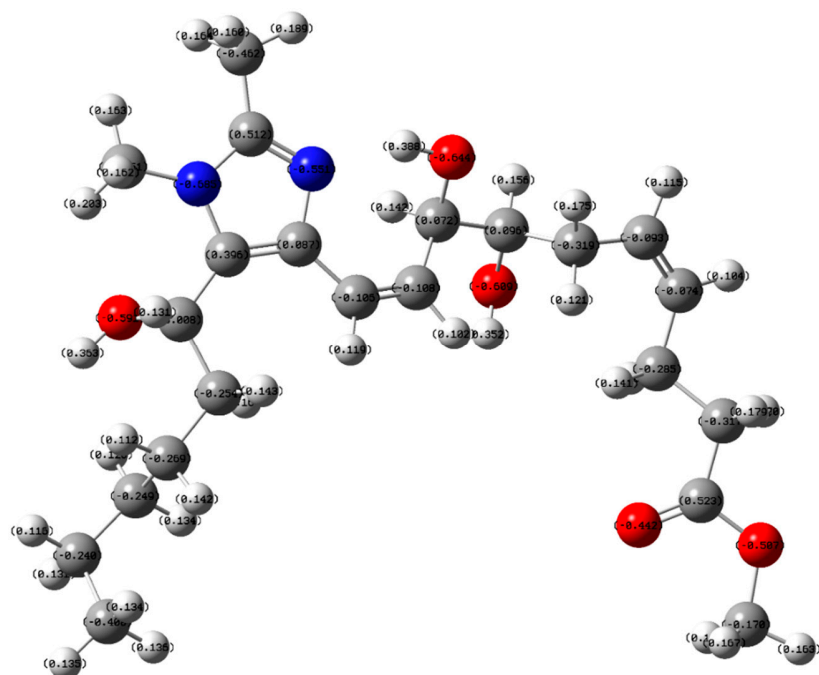

Figure S13: Mulliken charge distribution for analogue 2
